# Supplementary material for: Edisto Inlet as a sentinel for Late Holocene environmental changes over the Ross Sea: insights from foraminifera turnover events
Source: Copernicus journal article supplement (doi:10.5194/cp-21-1661-2025), 2025-09-23
Supplement: Supplementary file [file cp-21-1661-2025-supplement-title-page.pdf › cp-21-1661-2025-supplement-title-page.pdf]

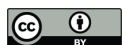

## *Supplement of*

# **Edisto Inlet as a sentinel for Late Holocene environmental changes over the Ross Sea: insights from foraminifera turnover events**

**Giacomo Galli et al.**

*Correspondence to:* Giacomo Galli ([giacomo.galli@unive.it](mailto:giacomo.galli@unive.it))

- [cp-21-1661-2025-supplement-title-page.pdf](#)
- [egusphere-2025-309-f01-thumb.jpg](#)
- [egusphere-2025-309-f01-web.jpg](#)
- [egusphere-2025-309-f01.jpg](#)
- [egusphere-2025-309-f02-thumb.png](#)
- [egusphere-2025-309-f02-web.png](#)
- [egusphere-2025-309-f02.png](#)
- [egusphere-2025-309-f03-thumb.png](#)
- [egusphere-2025-309-f03-web.png](#)
- [egusphere-2025-309-f03.png](#)
- [egusphere-2025-309-f04-thumb.png](#)
- [egusphere-2025-309-f04-web.png](#)
- [egusphere-2025-309-f04.png](#)
- [egusphere-2025-309-f05-thumb.png](#)
- [egusphere-2025-309-f05-web.png](#)
- [egusphere-2025-309-f05.png](#)
- [egusphere-2025-309-f06-thumb.png](#)
- [egusphere-2025-309-f06-web.png](#)
- [egusphere-2025-309-f06.png](#)

The copyright of individual parts of the supplement might differ from the article licence.
